# Supplementary material for: Phenotypic and Transcriptomics Analyses Reveal Underlying Mechanisms in a Mouse Model of Corneal Bee Sting
Source: Toxins (Basel). 2022 Jul 8;14(7):468. doi: 10.3390/toxins14070468 (PMC9323056; doi:10.3390/toxins14070468)
Supplement: Supplementary file 1 [file toxins-14-00468-s001.zip › toxins-1771931-supplementary.pdf]

# Supplementary Materials: Phenotypic and Transcriptomics Analyses Reveal Underlying Mechanisms in a Mouse Model of Corneal Bee Sting

Yanzi Wang, Honghua Kang, Mengyi Jin, Guoliang Wang, Weifang Ma, Zhen Liu, Yuhua Xue and Cheng Li

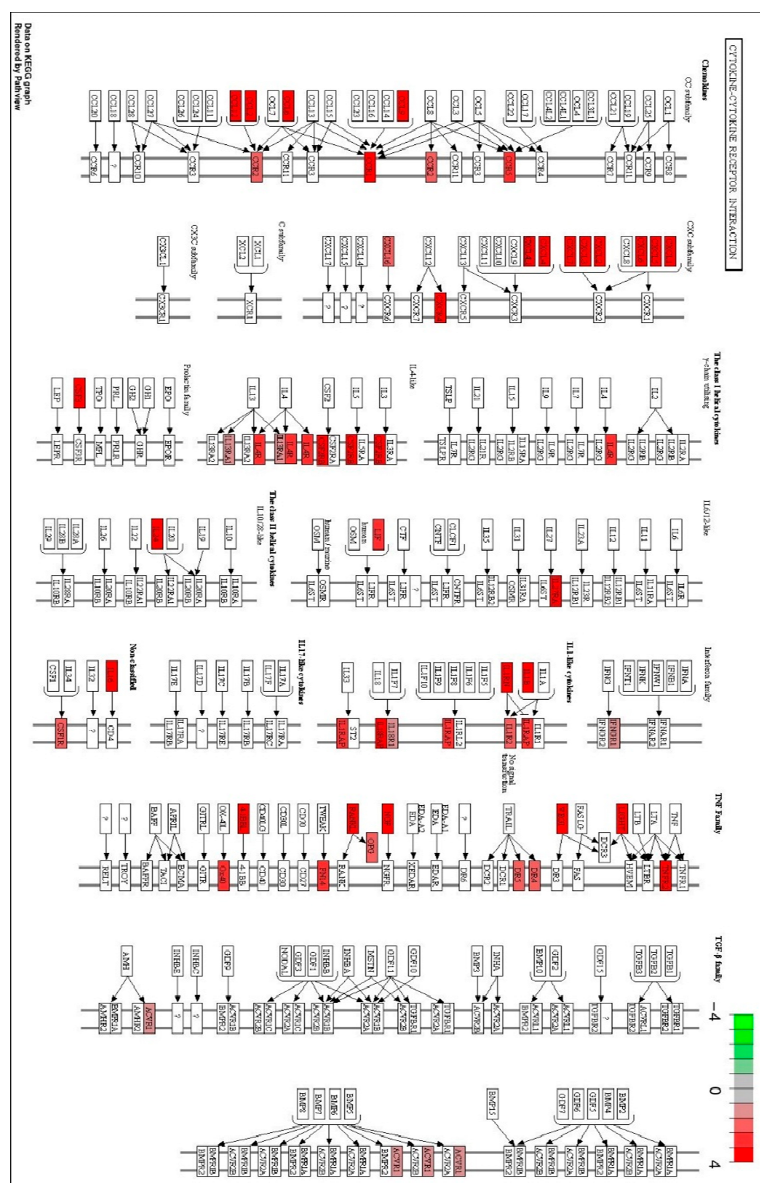

**Figure S1.** Differences in the most significant signaling pathways. Gene expression in cytokine-cytokine receptor interaction pathways was mapped using PATHVIEW. Red: upregulated genes; green: downregulated genes.
