# Supplementary figures and images for: Phenotypic and Transcriptomics Analyses Reveal Underlying Mechanisms in a Mouse Model of Corneal Bee Sting
Source: MDPI journal article supplement (doi:10.3390/toxins14070468), 2022-07-08

Yanzi Wang, Honghua Kang, Mengyi Jin, Guoliang Wang, Weifang Ma, Zhen Liu, Yuhua Xue  
and Cheng Li

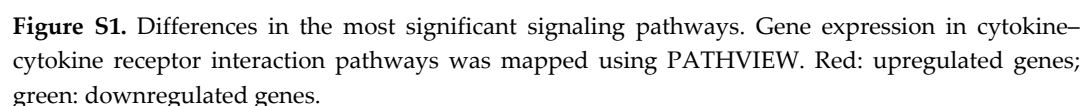

Supplement: s1 [file s1]
